# Supplementary material for: Metabolomic Analysis of Actinic Keratosis and SCC Suggests a Grade-Independent Model of Squamous Cancerization
Source: MDPI journal article supplement (doi:10.3390/cancers13215560), 2021-11-05
Supplement: s1 [file s1]

# Metabolomic Analysis of Actinic Keratosis and SCC Suggests a Grade-Independent Model of Squamous Cancerization

Valeria Righi <sup>1,†</sup>, Camilla Reggiani <sup>2,3,†</sup>, Elisabetta Tarentini <sup>2</sup>, Adele Mucci <sup>4</sup>, Alessia Paganelli <sup>2,3</sup>, Anna Maria Cesinaro <sup>5</sup>, Ema Mataka <sup>5</sup>, Shaniko Kaleci <sup>2</sup>, Barbara Ferrari <sup>2</sup>, Marco Meleti <sup>6</sup> and Cristina Magnoni <sup>2,\*</sup>

More than 40 metabolites in the tissues were identified; all the assignments are listed in Table S1. In the table are reported all the signals coming from mepivacaine, a local anesthetic used during surgery.

**Table S1.** List of <sup>1</sup>H and <sup>13</sup>C chemical Shift ( $\delta$ , ppm) of metabolites. <sup>a</sup>, <sup>1</sup>H chemical shifts refer to Ala doublet at 1.48 ppm;

<sup>b</sup>, <sup>13</sup>C chemical shifts refer to Ala at 19.3 ppm; <sup>c</sup>, contributes to the 3.77, 57.1 ppm cross-peak.

|   | Metabolites | $\delta^1\text{H}^a$ | $\delta^{13}\text{C}^b$ | Assignment                            |
|---|-------------|----------------------|-------------------------|---------------------------------------|
| 1 | Fatty acids | 0.89                 | 16.5                    | CH <sub>3</sub>                       |
|   |             | 1.32–1.29            | 25.4, 32.6–34.2         | (CH <sub>2</sub> ) <sub>n</sub>       |
|   |             | 1.59                 | 27.5                    | CH <sub>2</sub> -CH <sub>2</sub> -C=O |
|   |             | 2.04                 | 29.6                    | CH <sub>2</sub> CH=CH                 |
|   |             | 2.27                 | 36.1                    | CH <sub>2</sub> -C=O                  |
|   |             | 2.78                 | 27.9                    | =CH-CH <sub>2</sub> -CH=              |
|   |             | 5.32                 | 128–130                 | -CH=CH-                               |
| 2 | Lactate     | 1.33 (d)             | 22.7                    | CH <sub>3</sub>                       |
|   |             | 4.12 (q)             | 71.3                    | CH                                    |
| 3 | Alanine     | 1.48 (d)             | 19.3                    | CH <sub>3</sub>                       |
|   |             | 3.78                 | <sup>c</sup>            | $\alpha$ CH                           |
| 4 | Valine      | 0.98 (d)             | 21.7                    | $\gamma$ -CH <sub>3</sub>             |
|   |             | 1.04 (d)             | 20.7                    | $\gamma$ -CH <sub>3</sub>             |
|   |             | 2.27                 | 30.5                    | $\beta$ -CH                           |

|    |            |               |      |                                |
|----|------------|---------------|------|--------------------------------|
|    |            | 3.61          | c    | $\alpha$ -CH                   |
| 5  | Leucine    | 0.96          | 24.9 | $\delta$ -CH <sub>3</sub>      |
|    |            | 0.97          | 25.3 | $\delta$ -CH <sub>3</sub>      |
|    |            | 1.70          | 42.4 | $\beta$ -CH <sub>2</sub>       |
|    |            | 1.73          | 28.8 | $\gamma$ -CH <sub>2</sub>      |
|    |            | 3.72          | c    | $\alpha$ -CH                   |
| 6  | Lysine     | 1.47          | 22.6 | $\gamma$ -CH <sub>2</sub>      |
|    |            | 1.73          | 27.3 | $\delta$ -CH <sub>2</sub>      |
|    |            | 1.88          | 32.9 | $\beta$ -CH <sub>2</sub>       |
|    |            | 3.03          | 39,7 | $\epsilon$ -CH <sub>2</sub>    |
|    |            | 3.73          | c    | $\alpha$ -CH                   |
| 7  | Isoleucine | 1.00 (d)      | 15.5 | $\gamma$ -CH <sub>3</sub>      |
|    |            | 0.95–0.93 (t) | 11.7 | $\delta$ -CH <sub>3</sub>      |
| 8  | Acetate    | 1.92 (s)      | 26.6 | CH <sub>3</sub>                |
| 9  | Arginine   | 1.72,1.67     |      | $\gamma$ -CH <sub>2</sub>      |
|    |            | 1.91          |      | $\beta$ -CH <sub>2</sub>       |
|    |            | 3.25          |      | $\delta$ -CH <sub>2</sub>      |
|    |            | 3.76          | c    | $\alpha$ -CH                   |
| 10 | N-acetyl   | 2.06 (s)      | 24.8 | CH <sub>3</sub>                |
| 11 | Glutamine  | 2.13          | 29.0 | $\beta$ -CH <sub>2</sub>       |
|    |            | 2.45          | 33.4 | $\gamma$ -CH <sub>2</sub> (td) |
|    |            | 3.76          | c    | $\alpha$ -CH                   |
|    |            |               |      |                                |
| 12 | Methionine | 2.13 (s)      | 17.1 | SCH <sub>3</sub>               |
|    |            | 2.62 (t)      |      | $\gamma$ -CH <sub>2</sub>      |
|    |            | 2.16          |      | $\beta$ -CH <sub>2</sub>       |

|    |                   |            |      |                           |
|----|-------------------|------------|------|---------------------------|
|    |                   | 3.87       |      | $\alpha$ -CH              |
| 13 | Glutamate         | 2.36       | 36.4 | $\gamma$ -CH <sub>2</sub> |
|    |                   | 2.13, 2.07 | 29.2 | $\beta$ -CH <sub>2</sub>  |
|    |                   | 3.73       | c    | $\alpha$ -CH              |
| 14 | Proline           | 3.43, 3.34 |      | $\delta$ -CH <sub>2</sub> |
|    |                   | 2.01       |      | $\gamma$ -CH <sub>2</sub> |
|    |                   | 2.34, 2.08 |      | $\beta$ -CH <sub>2</sub>  |
|    |                   | 4.12       |      | $\alpha$ -CH              |
| 15 | Threonine         | 1.32       | 21.8 | $\gamma$ -CH <sub>3</sub> |
|    |                   | 3.56       | 69   | $\beta$ -CH               |
|    |                   | 4.25       | 66.9 | $\alpha$ -CH              |
| 16 | $\alpha$ -glucose | 5.24 (d)   | 92.6 | 1 CH                      |
|    |                   | 3.55       | 72   | 2 CH                      |
|    |                   | 3.72       | 73.1 | 3 CH                      |
|    |                   | 3.42       | 76.4 | 4 CH                      |
|    |                   | 3.82       | 71.9 | 6 CH <sub>2</sub>         |
| 17 | $\beta$ -glucose  | 4.64 (d)   | 96.4 | 1 CH                      |
|    |                   | 3.25       | 74.7 | 2 CH                      |
|    |                   | 3.49       | 76.3 | 3 CH                      |
|    |                   | 3.4        | 70.2 | 4 CH                      |
|    |                   | 3.47       | 76.4 | 5 CH                      |
|    |                   | 3.91       | 61.3 | 6 CH <sub>2</sub>         |
| 18 | Ribose            | 5.80       |      |                           |
| 19 | Creatine          | 3.03 (s)   | 39.6 | CH <sub>3</sub>           |
|    |                   | 3.95 (s)   | 56.4 | CH <sub>2</sub>           |
| 20 | Creatinine        | 3.05 (s)   |      | CH <sub>3</sub>           |

|    |                   |            |       |                                  |
|----|-------------------|------------|-------|----------------------------------|
|    |                   | 4.06 (s)   |       | CH <sub>2</sub>                  |
| 21 | Ethanolamine      | 3.15 (t)   |       | CH <sub>2</sub>                  |
|    |                   | 3.82 (t)   |       | CH <sub>2</sub>                  |
| 22 | Histidine         | 3.19       |       | β-CH <sub>2</sub>                |
|    |                   | 3.97       |       | α-CH                             |
|    |                   | 7.05 (s)   |       | 2-CH                             |
|    |                   | 7.78 (s)   |       | 4-CH                             |
| 23 | Phenylalanine     | 3.28, 3.11 |       | β-CH <sub>2</sub>                |
|    |                   | 3.99       |       | α-CH                             |
|    |                   | 7.34       | 130.1 | H- <i>ortho</i>                  |
|    |                   | 7.37       |       | H- <i>para</i>                   |
|    |                   | 7.43       | 129.6 | H- <i>meta</i>                   |
| 24 | Choline           | 3.20       | 56.6  | N(CH <sub>3</sub> ) <sub>3</sub> |
|    |                   | 3.50       | 68.2  | NCH <sub>2</sub>                 |
|    |                   | 4.08       | 56.5  | OCH <sub>2</sub>                 |
| 25 | Glycine           | 3.56 (s)   | 44.3  | CH <sub>2</sub>                  |
| 26 | Taurine           | 3.42 (t)   | 38.2  | N-CH <sub>2</sub>                |
|    |                   | 3.26 (t)   | 50.2  | S-CH <sub>2</sub>                |
| 27 | Tyrosine          | 6.88       |       | 5 CH                             |
|    |                   | 7.18       |       | 6 CH                             |
| 28 | Succinate         | 2.37 (s)   | 34.2  | CH <sub>2</sub>                  |
| 29 | Glycerol bound    | 4.30, 4.10 | 64.7  | CH <sub>2</sub>                  |
|    |                   | 5.22       | 71.7  | CH                               |
| 30 | Free Glycerol     | 3.56-3.65  | 63.3  | 1-CH <sub>2</sub>                |
|    |                   | 3.81       | 72.7  | 2-CH                             |
| 31 | Glyceryl          | 4.32       | 60    | α'-CH <sub>2</sub>               |
|    | phosphorylcholine | 3.67       | 66.6  | γ-CH <sub>2</sub>                |
|    |                   | 3.24 (s)   | 56.5  | N-CH <sub>3</sub>                |

|    |                   |            |      |                                  |
|----|-------------------|------------|------|----------------------------------|
| 32 | Phosphorylcholine | 3.22       | 54.7 | N(CH <sub>3</sub> ) <sub>3</sub> |
|    |                   | 3.61       | 67.3 | NCH <sub>2</sub>                 |
|    |                   | 4.22       | 59.0 | OCH <sub>2</sub>                 |
| 33 | Aspartate         | 2.68–2.82  | 37.2 | β-CH <sub>2</sub>                |
|    |                   | 3.90       |      | α-CH                             |
|    |                   | 2.85–2.96  | 26.3 | β-CH <sub>2</sub>                |
| 34 | Asparagine        | 4.01       |      | α-CH                             |
|    |                   | 2.39 (s)   | 29.1 | CH <sub>3</sub>                  |
|    |                   | 2.03, 2.51 | 27.9 | 2,4 CH <sub>2</sub>              |
| 35 | Pyruvate          | 2.41       | 32.5 | 3 CH <sub>2</sub>                |
|    |                   | 4.19       | 61.2 | 1 CH                             |
|    |                   | 3.53       | 72   | 1,3 CH                           |
| 36 | Pyroglutamic acid | 4.06       | 71.3 | 2 CH                             |
|    |                   | 3.63       | 73.1 | 4,6 CH                           |
|    |                   | 3.27       | 74.4 | 5 CH                             |
| 37 | Myo-inositol      | 3.36 (s)   | 73.6 | CH                               |
|    |                   | 3.87       | 59.2 | α-CH                             |
|    |                   | 3.94       | 63.2 | β-CH <sub>2</sub>                |
| 38 | Scyllo-inositol   | 1.18       | 17.5 | CH <sub>3</sub>                  |
|    |                   | 3.65       | 56.7 | CH <sub>2</sub>                  |
|    |                   | 2.55       |      | 5 CH <sub>2</sub>                |
| 39 | Serine            | 2.95       |      | 4 CH <sub>2</sub>                |
|    |                   | 4.57       |      | 1 CH                             |
|    |                   | 4.52       |      | 4 CH                             |
| 40 | EtOH              |            |      |                                  |
|    |                   |            |      |                                  |
|    |                   |            |      |                                  |
| 41 | Glutathione       |            |      |                                  |
|    |                   |            |      |                                  |
|    |                   |            |      |                                  |
| 42 | Ascorbate         |            |      |                                  |
|    |                   |            |      |                                  |
|    |                   |            |      |                                  |

|    |             |           |                   |
|----|-------------|-----------|-------------------|
|    |             | 4.01      | 5-CH              |
| 43 | Formate     | 8.48      | HCOO <sup>-</sup> |
| 44 | Mepivacaine | 2.18 (bs) | CH <sub>3</sub>   |
|    |             | 2.23 (bs) | CH <sub>3</sub>   |
|    |             | 7.21 (d)  | 3,5-CH            |
|    |             | 7.25 (t)  | 4-CH              |
| 45 | Fumarate    |           |                   |

**Table S2.** *p* values derived from the comparison between healthy and AKI, healthy and AKII, healthy and AKIII and finally healthy and SCC.

| Metabolites | Healthy vs : |              |               |             |
|-------------|--------------|--------------|---------------|-------------|
|             | P value AKI  | P value AKII | P value AKIII | P value SCC |
|             |              |              |               |             |
| Glc         | 0,3245       | 0,6092       | 0,0662        | 0,1344      |
| GSH         | 0,0359       | 0,1543       | 0,0542        | 0,1664      |
| Asc         | 0,0021       | 0,0000       | 0,0034        | 0,0913      |
| Lac         | 0,0002       | 0,0005       | 0,0007        | 0,0077      |
| Ser         | 0,0652       | 0,2487       | 0,0220        | 0,0094      |
| Gly         | 0,0715       | 0,0739       | 0,0011        | 0,0416      |
| Myo         | 0,2300       | 0,5725       | 0,0746        | 0,2561      |
| Tau1        | 0,0075       | 0,0036       | 0,0245        | 0,0127      |
| Scy         | 0,1675       | 0,1946       | 0,1142        | 0,2681      |
| Tau2        | 0,0111       | 0,0020       | 0,0962        | 0,0348      |
| GPC         | 0,0882       | 0,1198       | 0,0110        | 0,0221      |
| PC          | 0,0181       | 0,0094       | 0,0111        | 0,0886      |
| Cho         | 0,3953       | 0,6824       | 0,2268        | 0,0281      |
| EtA         | 0,0205       | 0,0574       | 0,0015        | 0,0019      |
| Cr          | 0,3076       | 0,1712       | 0,0016        | 0,1501      |
| Gln         | 0,0013       | 0,0006       | 0,0001        | 0,0012      |
| PGA         | 0,2173       | 0,9849       | 0,0204        | 0,0171      |
| Glu         | 0,0026       | 0,0004       | 0,0010        | 0,0015      |
| Met         | 0,0010       | 0,0159       | 0,0158        | 0,0153      |
| Nacetyl     |              | 0,6424       | 0,9933        | 0,4908      |
| Ac          | 0,6520       | 0,6412       | 0,0378        | 0,2958      |
| Ala         | 0,1195       | 0,0956       | 0,0232        | 0,0206      |
| Val         | 0,0315       | 0,0530       | 0,0022        | 0,0305      |

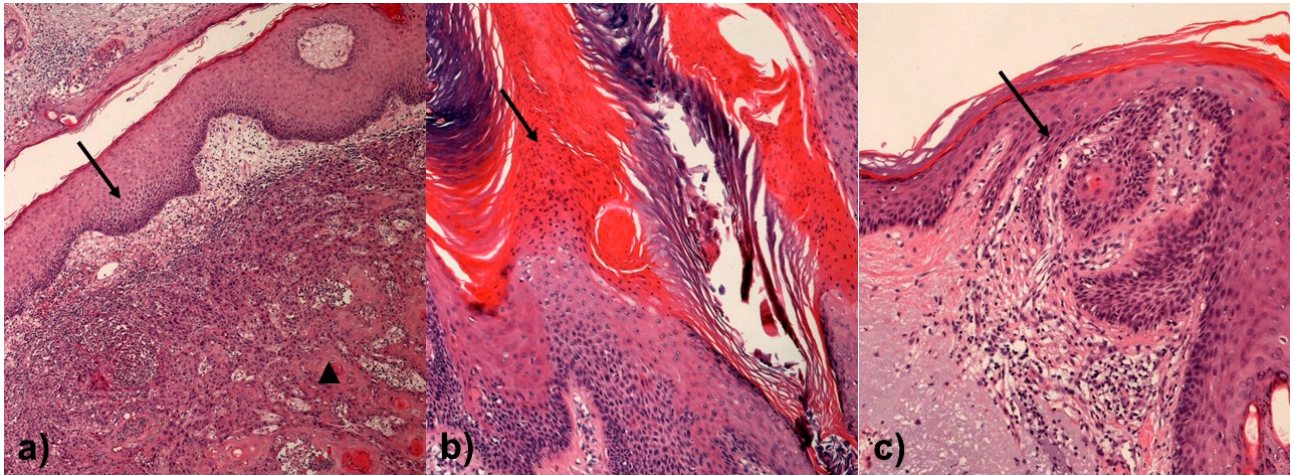

**Figure S1.** Selected histopathological section (hematoxylin and eosin,  $\times 100$  (A) and  $\times 40$  (B,C) magnification) corresponding to: (A) moderately differentiated SCC with Breslow thickness of 5 mm (triangle), associated with AK I (arrow); (B) AK III showing parakeratosis (arrow); (C) AK I characterized by the presence of hypertrophy (arrow).
